# Supplementary material for: Roadmap and roadblocks for the band gap tunability of metal halide perovskites
Source: Royal Society of Chemistry journal article supplement (doi:10.1039/c7ta00404d), 2017-01-01
Supplement: c7ta00404d1.pdf [file c7ta00404d1.pdf]

## Supporting Information

### Roadmap and roadblocks for the tunability of metal halide perovskites for multi-junction solar cell technology

E. L. Unger<sup>a,b\*</sup>, L. Kegelmann<sup>b</sup>, K. Suchan<sup>a</sup>, D. Sörell<sup>a</sup>, L. Korte<sup>b</sup> and S. Albrecht<sup>c</sup>

#### I. Experimental data sets from Master thesis of D. Sörell, Lund University, 2015

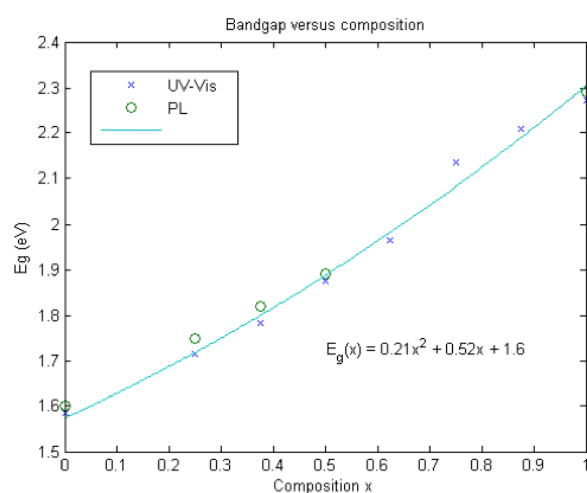

Figure S1a: Experimental data from the master thesis of David Sörell, published at Lund University in 2015 showing the dependence of the bandgap on composition  $x$  in  $\text{MAPb}(\text{Br}_x\text{I}_{1-x})_3$ .

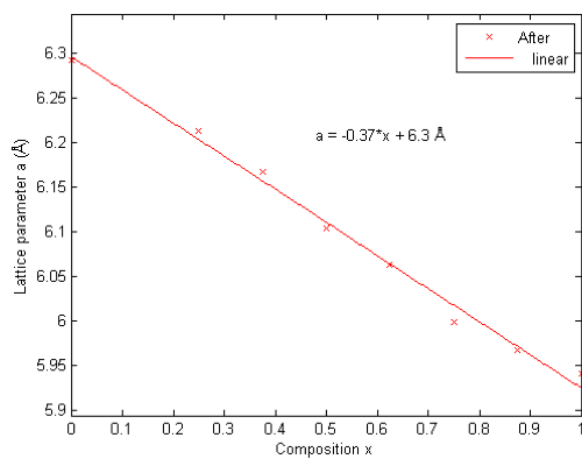

Figure S1b: Experimental data from the master thesis of David Sörell, published at Lund University in 2015 showing the dependence of the pseudocubic lattice parameter  $a_0$  on composition  $x$  in  $\text{MAPb}(\text{Br}_x\text{I}_{1-x})_3$ .

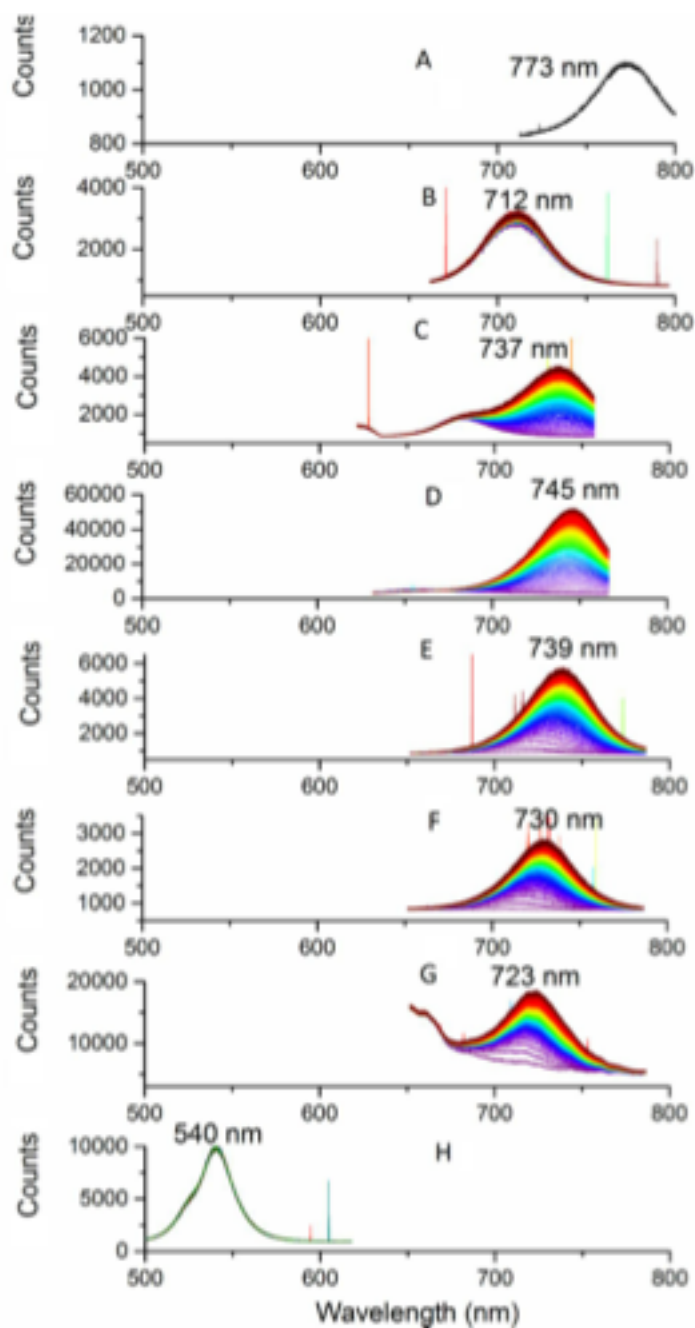

Figure S1c: Experimental data from the master thesis of David Sörell, published at Lund University in 2015 showing the photo-induced shift in the PL spectra for various different compositions of  $x$  in  $\text{MAPb}(\text{Br}_x\text{I}_{1-x})_3$ .

## II. Comments on experimental data sets from different literature sources utilized in the comparisons made here.

| Short                                                                         | Figure 1 & 4                                                                                                      | Figure 2                                                                                                                                | Figure 3                                                                                                 | © Copyright                                                                                     |
|-------------------------------------------------------------------------------|-------------------------------------------------------------------------------------------------------------------|-----------------------------------------------------------------------------------------------------------------------------------------|----------------------------------------------------------------------------------------------------------|-------------------------------------------------------------------------------------------------|
| Kulbak2015<br>Ref [22]<br>Kulbak, M. et al. <i>J. Phys. Chem. Lett.</i> 2015. | Device data as table insets shown in Fig.3 used for the comparisons of device performance metrics.                |                                                                                                                                         |                                                                                                          | Adapted from Ref [22] published under an ACS Author Choice Licence                              |
| Noh2013<br>Ref [9]                                                            | Fig. 4 give PV data as function of composition. Data was digitalized to extract values for band gap, Jsc and Voc. | Fig. 3c shows plots of band gap as function of composition and Figure 2 gives pseudo-cubic lattice parameter as function of composition |                                                                                                          | Reprinted with permission from references [9]. Copyright 2013 American Chemical Society.        |
| Eperon2014<br>Ref [14]                                                        | Device data shown in Fig 4 was included in comparison                                                             | Fig. 2 e displays band gap as function of pseudo-cubic lattice parameter. Band gap estimated from absorption onset                      |                                                                                                          | Adapted from ref [14]. Published by The Royal Society of Chemistry (RSC)                        |
| Eperon2016<br>Ref [18]                                                        | Device performance data summarized in Table 1.                                                                    | Band gap vs $a_0$ determined from Fig. 1 and $a_0$ was derived from additional data in SI                                               |                                                                                                          | From Ref [18]. Reprinted with permission from AAAS Copyright 2016.                              |
| Beal2016<br>Ref [17]                                                          | Device performance metrics stated in the descriptive text of the article                                          | Band gap energy and pseudo-cubic lattice parameter extracted from Fig. 2 a) by digitalization                                           |                                                                                                          | Adapted with permission from Ref [17]. Copyright 2016 American Chemical Society                 |
| Sutton2016<br>Ref [16]                                                        | Device data for champion cell of CsPbBrI <sub>2</sub> given in Fig. 3 as table inset                              |                                                                                                                                         | Photoluminescence as a function of composition derived from Fig. 1 c. Data was digitalized               | Adapted from ref [16]. Copyright 2016, published by WILEY-VCH Verlag GmbH & Co. KGaA, Weinheim. |
| Jacobsson2016<br>Ref [12]                                                     | Data for band gaps summarized in Table 1 and Device performance summarized in Table 4 used for this comparison    | Data for band gaps summarized in Table 1 and pseudo-cubic lattice parameter derived from unit cell volume compared in Table 2           | Values for initial and PL after light soaking were summarized in Table 3 and the supporting information. | Adapted from Ref [12] with permission of The Royal Society of Chemistry (RSC)                   |
| McMeekin2016<br>Ref [35]                                                      |                                                                                                                   | Absorption and pseudo-cubic lattice parameter available in supporting information of article                                            |                                                                                                          | From Ref [35]. Reprinted with permission from AAAS                                              |
| Heo2014                                                                       | Device performance                                                                                                |                                                                                                                                         |                                                                                                          | Adapted from ref                                                                                |

|                            |                                                                                                                   |                                                                                                        |                                     |                                                                                                                                                 |
|----------------------------|-------------------------------------------------------------------------------------------------------------------|--------------------------------------------------------------------------------------------------------|-------------------------------------|-------------------------------------------------------------------------------------------------------------------------------------------------|
| Ref [23]                   | data taken from Table 2 in this manuscript                                                                        |                                                                                                        |                                     | [23]. Copyright 2016, published by WILEY-VCH Verlag GmbH & Co. KGaA, Weinheim.                                                                  |
| Wu2016 Ref [24]            | Device performance data taken from Table 1 in the manuscript                                                      |                                                                                                        |                                     | Adapted from Ref. [24] with permission of The Royal Society of Chemistry                                                                        |
| Forgacs2016 Ref [25]       | Data for efficiency values as table inset in Fig. 2 c and f. Band gap estimated from EQE onset in Fig. 2 b and e. |                                                                                                        |                                     | Adapted from ref [25]. Copyright 2016, published by WILEY-VCH Verlag GmbH & Co. KGaA, Weinheim.                                                 |
| Saliba2016 Ref [3]         | Device performance data given in article                                                                          | Band gap as function of lattice constant derived from data sets in article and supporting information. |                                     | Adapted from Ref [3] published under a Creative Commons Attribution Non-Commercial 3.0 Unported Licence by The Royal Society of Chemistry (RSC) |
| Saliba2016 Science Ref [4] | Device performance and band gap of Rb incorporated sample discussed in text.                                      |                                                                                                        |                                     | From Ref [4]. Adapted with permission from AAAS.                                                                                                |
| Hao2014 Ref [26]           | Table 1 provides band gap and device performance metrics                                                          | Table 1 also provides pseudo cubic lattice parameters                                                  | No information about photostability | Adapted with permission from Macmillan Publisher Ltd: Nature Photonics from Ref [26]. Copyright 2014                                            |
| Zhao2016 Ref [19]          | Data for device performance metrics and band gap available.                                                       |                                                                                                        |                                     | Adapted from ref [19]. Copyright 2016, published by WILEY-VCH Verlag GmbH & Co. KGaA, Weinheim.                                                 |
| Zhao2017 Ref [21]          | Value for record performance low band gap device included.                                                        |                                                                                                        |                                     | Reprinted by permission from Macmillan Publishers Ltd: Nature Energy, copyright 2017                                                            |
| Yang2016 Ref [20]          | Device performance metrics as a function of band gap available in the supporting information.                     |                                                                                                        |                                     | Adapted with permission from ref [20]. Copyright 2016 American Chemical Society.                                                                |
| Mancini2015 Ref [45]       |                                                                                                                   | Band gap and pseudo-cubic lattice parameter as                                                         |                                     | Adapted with permission from Ref [45]. Copyright                                                                                                |

|                         |  |                                                                                                                                                                              |                                                                                                                                                                               |                                                                                           |
|-------------------------|--|------------------------------------------------------------------------------------------------------------------------------------------------------------------------------|-------------------------------------------------------------------------------------------------------------------------------------------------------------------------------|-------------------------------------------------------------------------------------------|
|                         |  | function of composition plotted in Fig.2 and Fig.4. Possibly, higher Sn-content materials have an artificially low band gap as materials may become metallic upon oxidation. |                                                                                                                                                                               | 2016 American Chemical Society.                                                           |
| Patrini2016<br>Ref [46] |  | Table 1 summarizes data of band gap as function of lattice parameter                                                                                                         |                                                                                                                                                                               | Adapted with permission from Ref [46]. Copyright 2016 American Chemical Society.          |
| Fedeli2015<br>Ref [9]   |  | Band gap as function of composition shown in Figure 3 and lattice parameter as function of composition in Fig. 1 b                                                           |                                                                                                                                                                               | Reprinted with permission from references [10]. Copyright 2015 American Chemical Society. |
| Hoke2015<br>Ref [11]    |  | Band gap as function of lattice spacing from SI data                                                                                                                         | Initial and PL after light soaking $\text{MAPb}(\text{Br}_x\text{I}_{1-x})_3$ and $\text{FAPb}(\text{Br}_x\text{I}_{1-x})_3$ shown in main article and supporting information | Reference [11] – Published by The Royal Society of Chemistry 2015.                        |
| Rehman2016<br>Ref [55]  |  |                                                                                                                                                                              | Photo-induced PL peak changes available from Fig. 4 for different compositions                                                                                                |                                                                                           |
